# Supplementary material for: Facile simultaneous synthesis of tetraaniline nanostructures/silver nanoparticles as heterogeneous catalyst for the efficient catalytic reduction of 4-nitrophenol to 4-aminophenol
Source: Royal Society of Chemistry journal article supplement (doi:10.1039/d0ra03327h), 2020-01-01
Supplement: d0ra03327h1.pdf [file d0ra03327h1.pdf]

**Supporting Information**

**Table S1:** Kinetic rate constants of different molar ratios of TAN/Ag NC prepared with NPPD to AgNO<sub>3</sub>

| Time (min) | 1:1     | 1:0.5    | 1:0.25   | 1:0.125  |
|------------|---------|----------|----------|----------|
| 0          | 0.26005 | 0.53493  | 0.26005  | 0.45616  |
| 10         | 0.19451 | 0.35331  | 0.14583  | -0.1087  |
| 20         | 0.14583 | 0.25813  | 0.0198   | -0.43696 |
| 30         | 0.11532 | 0.10803  | -0.1087  | -0.92382 |
| 40         | -0.1087 | -0.11207 | -0.3581  | -1.9951  |
| 50         | -0.2145 | -0.49457 | -0.55165 | -2.70306 |
